# Supplementary material for: Identification of candidate lncRNAs and circRNAs regulating WNT3/β-catenin signaling in essential hypertension
Source: publisher site journal article supplement (doi:10.18632/aging.103137), 2020-05-11
Supplement: Supplementary file [file aging-v12i9-103137-supplementary-material-SD2.pdf]

## SUPPLEMENTARY TABLES

**Supplementary Table 1. Characteristics of 3 hypertensive patients and 5 normotensive individuals of sequencing.**

| Characteristics          | Hypertension<br>(n=3) 1/2 | Normotension<br>(n=5) 3/2 |
|--------------------------|---------------------------|---------------------------|
| Gender (M/F)             |                           |                           |
| Age (years)              | 59.73 ± 6.08              | 60.17 ± 4.10              |
| SBP (mmHg)               | 161.00 ± 15.10**          | 114.70 ± 7.40             |
| DBP (mmHg)               | 98.77 ± 5.40**            | 78.97 ± 6.16              |
| BMI (kg/m <sup>2</sup> ) | 25.81 ± 3.29              | 24.17 ± 2.30              |
| FBG (mmol/L)             | 5.36 ± 1.04               | 5.08 ± 1.16               |
| TG (mmol/L)              | 1.67 ± 1.09               | 1.17 ± 0.86               |
| LDL (mmol/L)             | 2.97 ± 0.91               | 2.80 ± 0.73               |
| HDL (mmol/L)             | 1.14 ± 0.12               | 1.32 ± 0.27               |
| CHO (mmol/L)             | 4.93 ± 1.02               | 4.71 ± 0.79               |

#Data are mean ± standard deviation (SD).

## M, male; F, female; SBP, systolic blood pressure; DBP, diastolic blood pressure; BMI, body mass index; FBG, fasting blood glucose; TG, triglycerides; LDL, low density lipoprotein; HDL, high density lipoprotein; CHO, cholesterol.

\*\*P<0.01 vs. normotensive individuals.

**Supplementary Table 2. Correlation between the most significant DE lncRNAs, circRNAs and mRNAs.**

| Name             | mRNA    | Pearson  | P-value  | FDR      |
|------------------|---------|----------|----------|----------|
| LOC646616        | WNT3    | 0.999888 | 0.009524 | 0.048855 |
|                  | CAMK2N2 | 0.999920 | 0.008051 | 0.047351 |
| LAP3P2           | WNT3    | 0.999691 | 0.015827 | 0.048855 |
|                  | CAMK2N2 | 0.999996 | 0.001748 | 0.044093 |
| hsa_circ_0039388 | WNT3    | 0.999898 | 0.009100 | 0.045505 |
|                  | CAMK2N2 | 0.999122 | 0.026675 | 0.048718 |
| hsa_circ_0038648 | WNT3    | 0.999998 | 0.001173 | 0.041120 |
|                  | CAMK2N2 | 0.999668 | 0.016402 | 0.048514 |
| WNT3             | CAMK2N2 | 0.999619 | 0.017575 | 0.048855 |

#FDR: false discovery rate.

**Supplementary Table 3. Expression data (in units of FPKM) for the most significant DE lncRNAs and circRNAs.**

|              | FPKM        | FPKM        | FPKM        | FPKM        | FPKM        | FPKM       | FPKM        | FPKM        | EH1/2/3 vs NC1/2/3/4/5 |             |
|--------------|-------------|-------------|-------------|-------------|-------------|------------|-------------|-------------|------------------------|-------------|
| gene type    | EH_1F       | EH_1M       | EH_2F       | NC_1M       | NC_2F       | NC_2M      | NC_3M       | NC_3F       | EH average             | NC average  |
| LOC646616    | 23.32145695 | 22.82128303 | 19.68736046 | 1.43010615  | 1.863003619 | 0.90103621 | 1.722328318 | 1.744558523 | 21.94336681            | 1.532206564 |
| LAP3P2       | 0.916949814 | 0.268886904 | 0.451702508 | 0           | 0.177244944 | 0          | 0           | 0           | 0.5458464              | 0.035449    |
| circ_0039388 | 7.792171867 | 1.559141998 | 3.090355545 | 0           | 0           | 0          | 0.270651619 | 0           | 4.147223105            | 0.054130324 |
| circ_0038648 | 3.896085934 | 1.133921453 | 1.85421327  | 0.116586733 | 0.117713797 | 0          | 0           | 0           | 2.29474                | 0.04686     |

**Supplementary Table 4. Characteristics of 60 hypertensive patients and 60 normotensive individuals.**

| Characteristics          | Hypertension<br>(n=60) 26/34 | Normotension<br>(n=60) 30/30 |
|--------------------------|------------------------------|------------------------------|
| Gender (M/F)             |                              |                              |
| Age (years)              | 54.33± 8.94                  | 53.37± 9.18                  |
| SBP (mmHg)               | 158.33± 13.16**              | 119.60± 9.59                 |
| DBP (mmHg)               | 96.20± 5.46**                | 79.53± 5.75                  |
| Family history (%)       | 36.67                        | 26.67                        |
| Smoking (%)              | 43.33                        | 46.67                        |
| Drinking (%)             | 53.33                        | 50.00                        |
| BMI (kg/m <sup>2</sup> ) | 26.29±3.21                   | 25.39±2.81                   |
| FBG (mmol/L)             | 5.16±0.64                    | 4.99±0.51                    |
| TC (mmol/L)              | 4.57±0.98*                   | 4.07±0.60                    |
| TG (mmol/L)              | 1.87±0.14                    | 1.55±0.09                    |
| HDL (mmol/L)             | 1.06±0.22                    | 1.16±0.19                    |
| LDL (mmol/L)             | 2.81±0.90                    | 2.58±0.78                    |

#Data are mean ± SD.

\* $P < 0.05$ , \*\* $P < 0.01$  vs. normotensive individuals.

**Supplementary Table 5. Whole gene sequencing results of 7 DE lncRNAs and 2 DE circRNAs.**

| Test_id          | EH       | NH     | Log <sub>2</sub> FC | FDR      | Style | Length |
|------------------|----------|--------|---------------------|----------|-------|--------|
| DE lncRNAs       |          |        |                     |          |       |        |
| SCARNA7          | 12882.37 | 338.65 | 5.25                | 0.000072 | up    | 329    |
| RPS3AP20         | 223.78   | 9.59   | 4.55                | 0.009161 | up    | 858    |
| LOC646616        | 13.56    | 0.92   | 3.89                | 0.038099 | up    | 1346   |
| RPL34P25         | 7.39     | 39.60  | -2.42               | 0.003287 | down  | 436    |
| RPSAP16          | 31.19    | 64.98  | -1.06               | 0.006135 | down  | 986    |
| RPSAP36          | 6.47     | 24.99  | -1.95               | 0.024000 | down  | 1010   |
| LAP3P2           | 12.83    | 0.75   | 4.09                | 0.006210 | up    | 1695   |
| DE circRNAs      |          |        |                     |          |       |        |
| hsa_circ_0039388 | 26.09    | 1.06   | 4.63                | 0.000000 | up    | 381    |
| hsa_circ_0038648 | 15.90    | 0.79   | 4.33                | 0.000000 | up    | 533    |

\*The screening criteria were log<sub>2</sub> FC >1 or <-1, FDR<0.05.

**Supplementary Table 6. Multiple stepwise regression analysis showing variables independently associated with LOC646616 and hsa\_circ\_0038648.**

|                  | $\beta$ | SE    | $\beta'$ | t       |
|------------------|---------|-------|----------|---------|
| LOC646616        |         |       |          |         |
| Constant         | -0.280  | 0.276 |          | -0.101  |
| SBP              | 0.345   | 0.098 | 0.421    | 3.525*  |
| Cys C            | 0.262   | 0.123 | 0.230    | 2.135*  |
| Hcy              | 0.317   | 0.154 | 0.250    | 2.051*  |
| hsa_circ_0038648 |         |       |          |         |
| Constant         | 0.162   | 0.416 |          | 0.390   |
| SBP              | 0.300   | 0.142 | 0.364    | 2.119*  |
| HDL              | -0.330  | 0.161 | -0.233   | -2.039* |

# $\beta'$ : standardized  $\beta$ . Variables included in the original model are SBP, DBP, BMI, FBG, TC, TG, HDL, LDL, CRP, Hcy and Cys C. CRP, C-reactive protein; Hcy, homocysteine; Cys C, cystatin C. \* $P < 0.05$ .

**Supplementary Table 7. Primers sequences used for the studies.**

| Test_id           | Primer                                                                                                                   |
|-------------------|--------------------------------------------------------------------------------------------------------------------------|
| RPSAP36           | F primer 5'-GCTGAAGACCAGCCTCTCATA-3'<br>R primer 5'-CCACATCAAACCCACGGAGT-3'                                              |
| LOC646616         | F primer 5'-ACCGAAGGCACTACACGC-3'<br>R primer 5'-GAGATTGGAGCAGCAAATGG-3'                                                 |
| RPS3AP20          | F primer 5'-TTTGAATTGGGAAAGCTCATG-3'<br>R primer 5'-AACAGATTCTTGGACTGGTGG-3'                                             |
| RPL34P25          | F primer 5'-TCCCAGACCCTTGGTAATAGA-3'<br>R primer 5'-ACATGCCACATGCAGATTTT-3'                                              |
| SCARNA7           | F primer 5'-GCTTGTGGTGGCTATGGAA-3'<br>R primer 5'-GGTGAGCTGTTCTTGGGTTAT-3'                                               |
| RPSAP16           | F primer 5'-GGGTGCCCTCTGTGCCTAT-3'<br>R primer 5'-CCTGAGCAGTGGGAGCTGTA-3'                                                |
| LAP3P2            | F primer 5'-GAGCCCTCAGTCTTCTTG -3'<br>R primer 5'-AGATACCACCACTGTCAAA -3'                                                |
| GAPDH             | F primer 5'-TCTCTGCTCCTCCTGTTTCGA-3'<br>R primer 5'- GCGCCCAATACGACCAAATC-3'                                             |
| hsa_circ_0039388  | F primer 5'-AGGGGAGACCTCATTCAAGTTCTACA -3'<br>R primer 5'-TGTAGAACTGAATGAGGTCTCCCCT-3'                                   |
| hsa_circ_0038648  | F primer 5'-TTTTTCTCTATGCAGTCAGCTGAAA -3'<br>R primer 5'-TTTCAGCTGACTGCATAGAGAAAAA-3'                                    |
| miR-637           | F primer 5'-ACACTCCAGCTGGGACTGGGGGCTTTCGGGCT -3'<br>R primer 5'-CTCAACTGGTGTCTGGAGTCGGCAATTCAGTTGAGACGCAGAG-3'           |
| U6                | F primer 5'-CTCGCTTCGGCAGCACA-3'<br>R primer 5'-AACGCTTCACGAATTTGCGT-3'                                                  |
| miR-637 mimics    | Sense 5'-ACUGGGGGCUUUCGGGCUCUGCGU-3'<br>Antisense 5'-GCAGAGCCCGAAAGCCCCCAGUUU-3'                                         |
| miR-637 inhibitor | Sense 5'ACGCAGAGCCCGAAAGCCCCCAGU-3'<br>F primer 5'- CTGCCAGGAGTGTATTTCGCATC -3'<br>R primer 5'- GAGAGCCTCCCCGTCCACAG -3' |
| WNT3              | F primer 5'- CTGCCAGGAGTGTATTTCGCATC -3'<br>R primer 5'- GAGAGCCTCCCCGTCCACAG -3'                                        |
| CAMK2N2           | F primer 5'- CGCAGACCCCGAAGGTT-3'<br>R primer 5'-TTGCCAGCGAAGAAGGAGTT-3'                                                 |
| β-catenin         | F primer 5'-GGGACACAGCAGCAATTTGT-3'<br>R primer 5'-CAGCTGCACAAACAATGGAA-3'                                               |

\* RPSAP36, ribosomal protein SA pseudogene 36; LOC646616 transmembrane protein 183A pseudogene; RPS3AP20, ribosomal protein S3a pseudogene 20; RPL34P25, ribosomal protein L34 pseudogene 25; SCARNA7, small Cajal body-specific RNA 7; RPSAP16, ribosomal protein SA pseudogene 16; LAP3P2, leucine aminopeptidase 3 pseudogene 2; GAPDH, glyceraldehyde-3-phosphate dehydrogenase; has\_circ\_0039388, Homo sapiens\_circular RNA\_0039388; hsa\_circ\_0038648, Homo sapiens\_circular RNA\_0038648; miR-637, microRNA-637; U6, U6 small nuclear RNA; WNT3, Wnt family member 3; CAMK2N2, calcium/calmodulin dependent protein kinase II inhibitor 2.

**Supplementary Table 8. siRNA sequences used for the studies.**

|             | Sequence(5'-3')                                                |
|-------------|----------------------------------------------------------------|
| LOC646616-1 | Sense GCGGCUGGAUUAUAUAUCUTT<br>Antisense AGAUUAUAAUCCAGCCGCTT  |
| LOC646616-2 | Sense CCAUUAUUGUAUGAGCCAUTT<br>Antisense AUGGCUCAUACAUAUAUGGTT |
| LOC646616-3 | Sense CAGGAACCAAUGUGGAAAUTT<br>Antisense AUUCCACAUAUGGUUCCUGTT |
